# Supplementary material for: AtHB7/12 Regulate Root Growth in Response to Aluminum Stress
Source: MDPI journal article supplement (doi:10.3390/ijms21114080), 2020-06-07
Supplement: s1 [file s1]

**Supplementary Table S1.** Primers used in the study.

| Primer name  | Primer sequence           | Application                                          |
|--------------|---------------------------|------------------------------------------------------|
| AtHB7-F      | ATGACAGAAGGTGGAGAATA      | Cloning to pENTR for expression vectors construction |
| AtHB7-R      | TCATGACCAAAAATCCCGCC      |                                                      |
| AtHB12-F     | ATGGAAGAAGGAGATTTTTT      |                                                      |
| AtHB12-R     | TTATGACCAAAACTCCCACC      |                                                      |
| AtHB7pro-F   | ATATACTAGTTAACCACGACA     |                                                      |
| AtHB7pro-R   | AATGTTGTACTCAGTCTCG       |                                                      |
| AtHB12pro-F  | TTCTCATCAACTTGGCTTTC      |                                                      |
| AtHB12pro-R  | CATGGTTTTACCCAGATCTT      |                                                      |
| AtHB7-F1     | ATTGGGCTCTGCTGACATCATCGC  | Crispr/Cas9 based mutations of <i>AtHB7</i>          |
| AtHB7-R1     | AAACGCGATGATGTCAGCAGAGCC  |                                                      |
| AtHB7-F2     | ATTGCGACGAGCAGATCAAGTCAC  |                                                      |
| AtHB7-R2     | AAACGTGACTTGATCTGCTCGTCG  |                                                      |
| AtHB7-F3     | ATTGAGGGTTGCAGCCGAGGCAAG  |                                                      |
| AtHB7-R3     | AAACCTTGCCTCGGCTGCAACCCT  |                                                      |
| AtHB12-F1    | ATTGTGTTTCAGCGAGATTAGTAG  | Crispr/Cas9 based mutations of <i>AtHB12</i>         |
| AtHB12-R1    | AAACCTACTAATCTCGCTGAAACA  |                                                      |
| AtHB12-F2    | ATTGTAACCAAAAAGAGGTTTAGCG |                                                      |
| AtHB12-R2    | AAACCGCTAAACCTCTTTTGGTTA  |                                                      |
| AtHB12-F3    | ATTGAGGGCTGCAACCAAGACAAG  |                                                      |
| AtHB12-R3    | AAACCTTGTCTTGGTTGCAGCCCT  |                                                      |
| AtHB7-qRT-F  | GCTCAGAAAACGAAGAGAACCG    | qRT-PCR                                              |
| AtHB7-qRT-R  | GCTCCTCAAACCCACCAAAATA    |                                                      |
| AtHB12-qRT-F | GCAGAGACTAAACGAAGAGATG    |                                                      |
| AtHB12-qRT-R | TCTTTCCATTATGCGACTCT      |                                                      |
